# Supplementary material
Source: PubMed Central journal article supplement (PMC3428891)
Supplement: NIHMS37945-supplement-01.pdf [file NIHMS37945-supplement-01.pdf]

**Supplementary Table 1: Mean fibrinogen, hsCRP and PAI-1 according to thirds of BMI at 2 yrs and adulthood**

| <b>MEN</b>                  |   |                |               | <b>WOMEN</b>  |   |              |              |              |
|-----------------------------|---|----------------|---------------|---------------|---|--------------|--------------|--------------|
| <b>Fibrinogen<br/>(g/L)</b> |   | Adult BMI      |               |               |   | Adult BMI    |              |              |
|                             |   | 1              | 2             | 3             |   | 1            | 2            | 3            |
|                             |   | BMI at 2 years |               |               |   |              |              |              |
|                             | 1 | 2.48<br>(124)  | 2.50<br>(86)  | 2.56<br>(61)  | 1 | 2.62<br>(79) | 2.91<br>(62) | 2.93<br>(52) |
|                             | 2 | 2.50<br>(83)   | 2.54<br>(101) | 2.52<br>(92)  | 2 | 2.84<br>(67) | 2.79<br>(71) | 2.71<br>(61) |
|                             | 3 | 2.39<br>(65)   | 2.68<br>(95)  | 2.57<br>(113) | 3 | 2.58<br>(45) | 2.70<br>(66) | 2.77<br>(84) |
| <b>hsCRP<br/>(mg/l)</b>     |   |                |               | <b>WOMEN</b>  |   |              |              |              |
|                             |   | Adult BMI      |               |               |   | Adult BMI    |              |              |
|                             |   | 1              | 2             | 3             |   | 1            | 2            | 3            |
|                             |   | BMI at 2 yrs   |               |               |   |              |              |              |
|                             | 1 | 1.67<br>(118)  | 2.33<br>(85)  | 2.75<br>(61)  | 1 | 1.31<br>(81) | 1.93<br>(63) | 3.18<br>(53) |
|                             | 2 | 1.66<br>(79)   | 1.76<br>(101) | 2.56<br>(90)  | 2 | 1.13<br>(67) | 1.97<br>(70) | 2.99<br>(60) |
|                             | 3 | 1.33<br>(65)   | 1.87<br>(92)  | 2.46<br>(111) | 3 | 1.06<br>(46) | 1.75<br>(64) | 3.09<br>(82) |

**PAI-1**  
(ng/ml)

|              |   | Adult BMI     |               |                |
|--------------|---|---------------|---------------|----------------|
|              |   | 1             | 2             | 3              |
| BMI at 2 yrs | 1 | 73.7<br>(120) | 102.2<br>(86) | 118.6<br>(61)  |
|              | 2 | 75.6<br>(79)  | 85.0<br>(101) | 97.2<br>(91)   |
|              | 3 | 70.5<br>(65)  | 89.0<br>(93)  | 104.1<br>(112) |

|              |   | Adult BMI    |              |              |
|--------------|---|--------------|--------------|--------------|
|              |   | 1            | 2            | 3            |
| BMI at 2 yrs | 1 | 79.8<br>(79) | 73.9<br>(61) | 98.7<br>(52) |
|              | 2 | 70.9<br>(67) | 78.2<br>(70) | 77.4<br>(61) |
|              | 3 | 71.6<br>(45) | 75.6<br>(63) | 82.7<br>(81) |

**Supplementary Table 2: Mean plasma fibrinogen, serum CRP and plasma TPAI-1 concentrations according to height at birth, at age 2 years, 11 years and in adulthood**

| Fifths of height at | Men                |           |                          |                  |                       | Women              |           |                          |                  |                       |
|---------------------|--------------------|-----------|--------------------------|------------------|-----------------------|--------------------|-----------|--------------------------|------------------|-----------------------|
|                     | Height (cm) limits | N min,max | Plasma Fibrinogen (g/dl) | Serum CRP (mg/l) | Plasma TPAI-1 (ng/ml) | Height (cm) limits | N min,max | Plasma Fibrinogen (g/dl) | Serum CRP (mg/l) | Plasma TPAI-1 (ng/ml) |
| <b>Birth</b>        |                    |           |                          |                  |                       |                    |           |                          |                  |                       |
| 1                   | 41.0,47.1          | 152,155   | 2.54                     | 2.06             | 94.6                  | 39.0,46.7          | 107,109   | 2.83                     | 2.09             | 77.7                  |
| 2                   | 47.2,48.3          | 149,153   | 2.49                     | 1.90             | 94.2                  | 46.8,47.8          | 109,110   | 2.66                     | 1.75             | 71.1                  |
| 3                   | 48.4,49.4          | 147,154   | 2.58                     | 2.00             | 86.8                  | 47.9,48.6          | 101,104   | 2.81                     | 1.78             | 73.1                  |
| 4                   | 49.5,50.3          | 148,150   | 2.57                     | 2.02             | 97.8                  | 48.7,49.8          | 108,114   | 2.76                     | 2.01             | 84.0                  |
| 5                   | 50.4,57.5          | 151,152   | 2.52                     | 1.91             | 78.7                  | 49.9,56.0          | 106,108   | 2.73                     | 1.94             | 88.0                  |
|                     |                    |           | 0.01                     | -0.01            | -0.03                 |                    |           | -0.03                    | 0.00             | 0.09                  |
|                     |                    |           | -0.06 to 0.08            | -0.08 to 0.06    | -0.09 to 0.04         |                    |           | -0.12 to 0.06            | -0.10 to 0.09    | 0.00 to 0.18          |
|                     |                    |           | 0.8                      | 0.8              | 0.5                   |                    |           | 0.5                      | 0.9              | 0.05                  |
|                     |                    |           | 0.00                     | -0.03            | -0.04                 |                    |           | -0.04                    | -0.09            | 0.08                  |
|                     |                    |           | -0.07 to 0.07            | -0.10 to 0.04    | -0.11 to 0.03         |                    |           | -0.14 to 0.05            | -0.17 to -0.01   | -0.02 to 0.17         |
|                     |                    |           | 0.9                      | 0.4              | 0.3                   |                    |           | 0.4                      | 0.04             | 0.1                   |
| <b>Age 2 years</b>  |                    |           |                          |                  |                       |                    |           |                          |                  |                       |
| 1                   | 68.3,78.2          | 162,165   | 2.50                     | 1.91             | 81.9                  | 67.2,76.8          | 118,119   | 2.78                     | 1.83             | 78.6                  |
| 2                   | 78.3,80.3          | 160,165   | 2.57                     | 2.01             | 84.0                  | 76.8,79.0          | 114,117   | 2.75                     | 2.01             | 73.2                  |
| 3                   | 80.3,81.9          | 163,166   | 2.46                     | 2.04             | 91.4                  | 79.0,80.6          | 117,120   | 2.78                     | 2.15             | 75.6                  |
| 4                   | 81.9,84.1          | 161,163   | 2.57                     | 2.08             | 97.7                  | 80.7,82.5          | 118,121   | 2.76                     | 1.94             | 80.4                  |
| 5                   | 84.1,91.6          | 162,167   | 2.56                     | 1.87             | 90.9                  | 82.5,91.6          | 117,119   | 2.71                     | 1.69             | 84.8                  |
|                     |                    |           | 0.03                     | 0.00             | 0.08                  |                    |           | -0.03                    | -0.03            | 0.03                  |
|                     |                    |           | -0.04 to 0.10            | -0.07 to 0.07    | 0.01 to 0.15          |                    |           | -0.12 to 0.05            | -0.11 to 0.05    | -0.05 to 0.11         |

|                                  |             |         |               |                |               |             |         |                |                |               |
|----------------------------------|-------------|---------|---------------|----------------|---------------|-------------|---------|----------------|----------------|---------------|
| <i>p-value</i>                   |             |         | 0.4           | 1.0            | 0.02          |             |         | 0.4            | 0.4            | 0.5           |
| <i>B* adjusted for adult BMI</i> |             |         | 0.02          | -0.06          | 0.04          |             |         | -0.05          | -0.13          | 0.01          |
| <i>(95% CI)</i>                  |             |         | -0.05 to 0.09 | -0.13 to 0.01  | -0.03 to 0.11 |             |         | -0.14 to 0.03  | -0.20 to -0.06 | -0.07 to 0.10 |
| <i>p-value</i>                   |             |         | 0.6           | 0.1            | 0.2           |             |         | 0.2            | <0.001         | 0.8           |
| <b>Age 11 years</b>              |             |         |               |                |               |             |         |                |                |               |
| 1                                | 115.9,131.2 | 158,163 | 2.50          | 2.14           | 83.8          | 111.1,127.9 | 118,119 | 2.74           | 1.80           | 76.9          |
| 2                                | 131.2,134.2 | 159,163 | 2.51          | 1.97           | 88.8          | 128.0,132.1 | 114,117 | 2.78           | 1.91           | 79.8          |
| 3                                | 134.3,137.1 | 158,160 | 2.58          | 1.90           | 85.7          | 132.1,135.9 | 116,118 | 2.70           | 1.97           | 75.0          |
| 4                                | 137.1,140.4 | 164,165 | 2.51          | 1.86           | 99.2          | 135.9,140.4 | 118,121 | 2.79           | 1.74           | 82.4          |
| 5                                | 140.4,154.3 | 159,164 | 2.52          | 1.97           | 93.1          | 140.5,154.7 | 112,117 | 2.79           | 1.94           | 86.0          |
|                                  |             |         | 0.02          | -0.02          | 0.09          |             |         | -0.01          | 0.01           | 0.06          |
| <i>(95% CI)</i>                  |             |         | -0.06 to 0.10 | -0.10 to 0.06  | 0.01 to 0.17  |             |         | -0.09 to 0.06  | -0.06 to 0.08  | -0.02 to 0.13 |
| <i>p-value</i>                   |             |         | 0.6           | 0.6            | 0.03          |             |         | 0.7            | 0.8            | 0.1           |
| <i>B* adjusted for adult BMI</i> |             |         | 0.01          | -0.10          | 0.03          |             |         | -0.04          | -0.09          | 0.04          |
| <i>(95% CI)</i>                  |             |         | -0.08 to 0.09 | -0.18 to -0.03 | -0.05 to 0.11 |             |         | -0.11 to 0.04  | -0.16 to -0.03 | -0.04 to 0.11 |
| <i>p-value</i>                   |             |         | 0.9           | 0.01           | 0.4           |             |         | 0.3            | 0.006          | 0.3           |
| <b>Adult Life</b>                |             |         |               |                |               |             |         |                |                |               |
| 1                                | 147.0,164.6 | 171,173 | 2.56          | 2.20           | 85.1          | 136.6,150.1 | 121,122 | 2.85           | 1.82           | 85.5          |
| 2                                | 164.7,168.0 | 168,172 | 2.46          | 1.92           | 88.1          | 150.2,153.2 | 123,128 | 2.78           | 1.89           | 74.7          |
| 3                                | 168.1,171.0 | 172,176 | 2.57          | 2.15           | 84.2          | 153.3,156.0 | 128,128 | 2.74           | 2.08           | 80.5          |
| 4                                | 171.1,174.6 | 174,177 | 2.54          | 1.85           | 93.4          | 156.1,159.1 | 121,123 | 2.70           | 2.14           | 67.0          |
| 5                                | 174.7,190.9 | 168,172 | 2.53          | 1.87           | 94.7          | 159.2,178.7 | 117,120 | 2.73           | 1.57           | 87.9          |
|                                  |             |         | -0.04         | -0.06          | 0.05          |             |         | -0.13          | -0.03          | 0.01          |
| <i>(95% CI)</i>                  |             |         | -0.14 to 0.06 | -0.16 to 0.04  | -0.05 to 0.15 |             |         | -0.27 to 0.00  | -0.16 to 0.11  | -0.12 to 0.15 |
| <i>p-value</i>                   |             |         | 0.5           | 0.2            | 0.3           |             |         | 0.05           | 0.7            | 0.8           |
| <i>B* adjusted for adult BMI</i> |             |         | -0.05         | -0.10          | 0.02          |             |         | -0.15          | -0.10          | 0.00          |
| <i>(95% CI)</i>                  |             |         | -0.15 to 0.05 | -0.20 to 0.00  | -0.08 to 0.12 |             |         | -0.28 to -0.02 | -0.22 to 0.02  | -0.13 to 0.13 |
| <i>p-value</i>                   |             |         | 0.3           | 0.04           | 0.6           |             |         | 0.03           | 0.1            | 1.0           |

The means presented are unadjusted. The summary effect size estimates (regression coefficient (B) and 95% confidence intervals) and p values are derived from linear regression analyses, using all variables (measures of height in early-life and adult pro-inflammatory markers) as continuous standardised variables. These estimates are presented adjusted first for age alone, and then adjusted for adult BMI and other covariates as follows: alcohol consumption (four levels from none to heavy), tobacco use (never, ex-user, current user), socio-economic status in childhood (father's occupation, ranging from 1 (low class) to 6 (high class)), adult socio-economic status derived from education level, household possessions and occupation (ranging from 1 (low class) to 17 (high class)) and family history of high blood pressure, angina, myocardial infarction, stroke or diabetes in a first degree relative.

**Supplementary Table 3: Multiple linear regression analyses using conditional Height SD-scores in earlier life to predict adult outcomes**

| Risk Factors           | Height at birth<br>(SD score) |            |     | Height change<br>birth – 2 years (SD)* |            |      | Height change<br>2-11 years (SD)* |            |      | Height change<br>11-adult (SD)* |             |       |
|------------------------|-------------------------------|------------|-----|----------------------------------------|------------|------|-----------------------------------|------------|------|---------------------------------|-------------|-------|
|                        | B                             | 95% CI     | p   | B                                      | 95% CI     | p    | B                                 | 95% CI     | p    | B                               | 95% CI      | p     |
| <b>MEN</b>             |                               |            |     |                                        |            |      |                                   |            |      |                                 |             |       |
| <b>Fibrinogen (SD)</b> | 0.00                          | -0.08,0.08 | 1.0 | -0.03                                  | -0.11,0.05 | 0.5  | 0.01                              | -0.07,0.09 | 0.8  | -0.07                           | -0.15,0.01  | 0.09  |
| <b>hsCRP (SD)</b>      | -0.03                         | -0.11,0.05 | 0.4 | 0.01                                   | -0.07,0.09 | 0.8  | 0.01                              | -0.07,0.09 | 0.8  | -0.04                           | -0.12,0.03  | 0.3   |
| <b>PAI-1 (SD)</b>      | -0.01                         | -0.09,0.06 | 0.7 | 0.07                                   | -0.01,0.15 | 0.08 | -0.01                             | -0.08,0.07 | 0.9  | -0.03                           | -0.10,0.05  | 0.5   |
| <b>WOMEN</b>           |                               |            |     |                                        |            |      |                                   |            |      |                                 |             |       |
| <b>Fibrinogen (SD)</b> | -0.06                         | -0.15,0.04 | 0.2 | -0.10                                  | -0.20,0.04 | 0.06 | 0.01                              | -0.09,0.10 | 0.9  | -0.09                           | -0.19,0.00  | 0.06  |
| <b>hsCRP (SD)</b>      | -0.02                         | -0.11,0.06 | 0.6 | -0.05                                  | -0.15,0.05 | 0.3  | 0.04                              | -0.05,0.13 | 0.4  | -0.04                           | -0.14,0.05  | 0.3   |
| <b>PAI-1 (SD)</b>      | 0.07                          | -0.02,0.17 | 0.1 | -0.05                                  | -0.15,0.05 | 0.3  | 0.09                              | -0.01,0.18 | 0.07 | -0.13                           | -0.22,-0.04 | 0.007 |

\*Height changes are calculated as conditional measures (see Statistical Methods). The continuous outcome variables were normalised so that B (regression coefficient) values indicate the SD change in the outcome per SD change in the predictor. All analyses are adjusted for age and alcohol consumption (four levels from none to heavy), tobacco use (never, ex-user, current user), socio-economic status in childhood (father's occupation, ranging from 1 (low class) to 6 (high class)), adult socio-economic status derived from education level, household possessions and occupation (ranging from 1 (low class) to 17 (high class)) and family history of high blood pressure, angina, myocardial infarction, stroke or diabetes in a first degree relative.
